# Supplementary material for: To fast or not to fast: Lipid measurement and cardiovascular disease risk estimation in rural sub-Saharan Africa
Source: PubMed Central journal article supplement (PMC7101029; doi:10.7189/jogh.10.010407), 2020-06
Supplement: jogh-10-010407-s001.pdf [file jogh-10-010407-s001.pdf]

**Table S1. Sensitivity analysis, unadjusted and adjusted models for direct LDL-C (mg/dL) on carotid intima media thickness (mm), per 100-unit increase‡**

| Fasting Group | Unadjusted                   |                 |                 | Adjusted*                    |                 |                 |
|---------------|------------------------------|-----------------|-----------------|------------------------------|-----------------|-----------------|
|               | $\beta$ coefficient (95% CI) | <i>P</i> -value | R-squared value | $\beta$ coefficient (95% CI) | <i>P</i> -value | R-squared value |
| Non-fasting   | 0.0990 (-0.0304, 0.228)      | 0.129           | 0.068           | 0.119 (-0.0044, 0.2818)      | 0.144           | 0.494           |
| Fasting       | 0.0760 (0.0218, 0.130)       | 0.006           | 0.044           | 0.0206 (-0.0264, 0.0677)     | 0.388           | 0.461           |
| Total         | 0.0875 (0.0376, 0.137)       | 0.001           | 0.056           | 0.0457 (0.0015, 0.0898)      | 0.043           | 0.415           |

\*Analysis conducted for 202 participants for whom direct LDL-C measurements were obtained.

**Table S2. Effect Modification of Fasting Status and HIV Status on the Relationship Between cIMT and LDL-C, nHDL-C in Adjusted Models**

|                                                       | <b>Fasting Status</b>                                      |                |                                           |                | <b>HIV Status</b>                                          |                |                                           |                |
|-------------------------------------------------------|------------------------------------------------------------|----------------|-------------------------------------------|----------------|------------------------------------------------------------|----------------|-------------------------------------------|----------------|
|                                                       | <b>Interaction term <math>\beta</math> coeff. (95% CI)</b> | <b>P-value</b> | <b><math>\beta</math> coeff. (95% CI)</b> | <b>P-value</b> | <b>Interaction term <math>\beta</math> coeff. (95% CI)</b> | <b>P-value</b> | <b><math>\beta</math> coeff. (95% CI)</b> | <b>P-value</b> |
| <b>LDL-C level (mg/dL), per 100 unit increase</b>     | -0.0112 (-0.0360, 0.0135)                                  | 0.372          | 0.0595 (0.0202, 0.0987)                   | 0.003          | 0.0268 (-0.0387, 0.0923)                                   | 0.421          | 0.0341 (-0.0172, 0.0854)                  | 0.191          |
| <b>Non-HDL-C level (mg/dL), per 100 unit increase</b> | -0.00761 (-0.0265, 0.0112)                                 | 0.427          | 0.0476 (0.0133, 0.0820)                   | 0.007          | 0.00789 (-0.0510, 0.0667)                                  | 0.792          | 0.0373 (-0.00872, 0.0833)                 | 0.112          |

**Table S3. Association between LDL-C, nHDL-C and Age, by Fasting Status**

| Lipid Measure                                  | Fasting Group | Age (per year increase)      |                 |                 |
|------------------------------------------------|---------------|------------------------------|-----------------|-----------------|
|                                                |               | $\beta$ coefficient (95% CI) | <i>P</i> -value | R-squared value |
| LDL-C level (mg/dL), per 100 unit increase     | Non-fasting   | -1.02 (-6.22, 4.17)          | 0.697           | 0.002           |
|                                                | Fasting       | 3.94 (0.86, 7.02)            | 0.012           | 0.029           |
|                                                | Total         | 2.43 (-0.22, 5.09)           | 0.073           | 0.011           |
| Non-HDL-C level (mg/dL), per 100 unit increase | Non-fasting   | -1.00 (-5.53, 3.52)          | 0.660           | 0.002           |
|                                                | Fasting       | 4.80 (2.00, 7.59)            | 0.001           | 0.052           |
|                                                | Total         | 3.07 (0.67, 5.46)            | 0.012           | 0.021           |
